# Supplementary material
Source: publisher figshare collection journal article supplement (https://tandf.figshare.com/articles/dataset/_/1093878)
Supplement: Supplementary file 1 [file 2]

Appendix 1. Dental and postcranial metrics of *Siamotragulus songhorensis* (after Sánchez & Morales, 2008). Measurements in milimeters.

#### Lower molars

| Specimen       | Piece | Length | Width |
|----------------|-------|--------|-------|
| NAP XXI 10j'08 | m1    | 7,14   | 4,24  |
| NAP XXI 10k'08 | m1    | 7,14   | -     |
| NAP XXI 10i'08 | m3    | -      | 4,56  |

#### Humerus

| Specimen       | 1     | 2     | 3    | 4    | 5     | 6     | 7     | 8    |
|----------------|-------|-------|------|------|-------|-------|-------|------|
| NAP XXI 10j'08 | 77,87 | 75,81 | 3,88 | 7,02 | 14,40 | 17,05 | 12,91 | 9,10 |

#### Radius

| Specimen     | 1 | 2 | 3    | 4    | 5 | 6    | 7 | 8 | 9    | 10 |
|--------------|---|---|------|------|---|------|---|---|------|----|
| NAP XXI 4'12 | - | - | 7,01 | 4,09 | - | 6,16 | - | - | 6,29 | -  |

#### Scaphoid

| Specimen       | Length | Width | Heigth |
|----------------|--------|-------|--------|
| NAP XXI 10b'11 | 6,88   | 3,34  | 5,28   |

#### Femur

| Specimen       | 1 | 2 | 3    | 4    | 5     | 6    | 7    | 8    |
|----------------|---|---|------|------|-------|------|------|------|
| NAP XXI 10e'08 | - | - | 7,23 | 6,56 | 18,90 | 9,71 | 9,54 | 8,76 |

#### Tibia

| Specimen       | 1 | 2 | 3    | 4    | 5 | 6 | 7     | 8 |
|----------------|---|---|------|------|---|---|-------|---|
| NAP XXI 10c'08 | - | - | 6,38 | 6,51 | - | - | 10,42 | - |

**Calcaneum**

| Specimen       | 1 | 2     | 3    | 4    | 5    | 6    | 7    | 8     |
|----------------|---|-------|------|------|------|------|------|-------|
| NAP XXI 10c'08 | - | -     | 8,31 | -    | -    | 3,97 | 8,40 | 11,12 |
| NAP XXI 10n'08 | - | 19,61 | 8,20 | 6,25 | 7,17 | 4,09 | 8,58 | -     |

**Astragalus**

| Specimen       | 1 | 2     | 3    | 4 | 5    | 6    |
|----------------|---|-------|------|---|------|------|
| NAP XXI 10c'08 | - | 14,68 | 8,97 | - | 7,01 | 7,61 |

**Navicular-cuboid**

| Specimen       | 1    | 2     | 3     | 4    | 5    | 6 |
|----------------|------|-------|-------|------|------|---|
| NAP XXI 10c'08 | 9,27 | 10,26 | 11,96 | 9,31 | 8,51 | - |

**Metatarsal III-IV**

| Specimen         | 1 | 2 | 3    | 4    | 5    | 6    | 7     | 8     | 9    |
|------------------|---|---|------|------|------|------|-------|-------|------|
| NAP XXI 10m'08   | - | - | -    | -    | -    | -    | 12,06 | 11,87 | 6,86 |
| NAP XXI 10a'08-1 | - | - | 6,44 | 5,26 | -    | -    | -     | -     | 6,38 |
| NAP XXI 10c'08   | - | - | 6,26 | 5,29 | 9,28 | 9,52 | -     | -     | -    |

**First phalanx**

| Specimen       | 1     | 2    | 3    | 4    | 5    | 6    | 7    |
|----------------|-------|------|------|------|------|------|------|
| NAP XXI 40a'10 | 15,99 | 5,72 | 5,98 | 4,50 | 4,60 | 4,41 | 3,88 |
| NAP XXI 40c'10 | 10,66 | 5,06 | 5,03 | 3,65 | 4,32 | 3,63 | 3,93 |

**Second phalanx**

| Specimen         | 1 | 2    | 3    | 4 | 5 | 6 | 7 |
|------------------|---|------|------|---|---|---|---|
| NAP XXI 10a'08-3 | - | 4,90 | 5,72 | - | - | - | - |

**Third phalanx**

| <b>Specimen</b> | <b>1</b> | <b>2</b> | <b>3</b> | <b>4</b> | <b>5</b> |
|-----------------|----------|----------|----------|----------|----------|
| NAP XXI 40d'10  | -        | -        | 5,08     | 3,92     | 4,87     |
