# Supplementary material
Source: publisher figshare collection journal article supplement (https://tandf.figshare.com/articles/dataset/_/1093878)
Supplement: Supplementary file 2 [file 2]

|            |                                                       |
|------------|-------------------------------------------------------|
| Characters | 000000000111111111122222222233333333334444444445555   |
|            | 12345678901234567890123456789012345678901234567890123 |

# Terminals

|                                     |                                                       |
|-------------------------------------|-------------------------------------------------------|
| <i>Zhailimeryx jingweni</i>         | ??????1100020000000001010000?10100??????????????????  |
| <i>Archaeotragulus krabiensis</i>   | ??????????????00000000?01000010020??????????????????  |
| <i>Siamotragulus sanyathanai</i>    | ??????11011011111001101A010020002110A0?00011-00210001 |
| <i>Siamotragulus bugtiensis</i>     | ??????1101101?101001100001001??021111?0???11?1?10000? |
| <i>Siamotragulus songhorensis</i>   | ??????0101111?111001100011001??0211100000000-00100001 |
| <i>Dorcatherium crassum</i>         | ??????2100000A0010000000010A11002122011??0??001001003 |
| <i>Dorcatherium nauti</i>           | ????0021000000011000101011002001211?1??????1?1??1001  |
| <i>Dorcabune anthracotherioides</i> | ??????1100020?001000000111000??0200?????????????????? |
| <i>Afrotragulus moruorotensis</i>   | ??????0101101?121112122211100??0211?????????????????? |
| <i>Afrotragulus parvus</i>          | ??????0101101?121112122211100??0211?????????????????? |
| <i>Moschiola meminna</i>            | 10000011011011121002201B11001011211100011002-00212100 |
| <i>Tragulus javanicus</i>           | 01111100-01011121002201111002011211100011102-00212122 |
| <i>Hyemoschus aquaticus</i>         | 10110001101011011001101011001000211211111002101002210 |

Notations: **A** = 0/1; **B** = 1/2; - = not applicable; ? = missing
